# Supplementary material for: Interferon-γ Production by Peripheral Lymphocytes Predicts Survival of Tumor-Bearing Mice Receiving Dual PD-1/CTLA-4 Blockade
Source: Oxford University Press journal article supplement (doi:10.1158/2326-6066.cir-16-0022), 2016-06-05
Supplement: 23266066cir160022-sup-161876_1_supp_3438410_858hvg.docx [file 23266066cir160022-sup-161876_1_supp_3438410_858hvg.docx]

http://mycancerproject.org/wp-content/uploads/2016/02/BOSS-Relationships-Feb17.html
